# Supplementary material
Source: PubMed Central journal article supplement (PMC2975157)

# ENDOPLASMIC RETICULUM STRESS-ACTIVATED C/EBP HOMOLOGOUS PROTEIN ENHANCES NUCLEAR FACTOR- $\kappa$ B SIGNALS VIA REPRESSION OF PEROXISOME PROLIFERATOR-ACTIVATED RECEPTOR $\gamma$

Running title: CHOP-repressed PPAR $\gamma$  by ER stress

Seong-Hwan Park<sup>1</sup>, Hye Jin Choi<sup>1</sup>, Hyun Yang<sup>1</sup>, Kee Hun Do<sup>1</sup>, Juil Kim<sup>1</sup>, Dong Won Lee<sup>2</sup> and Yuseok Moon<sup>1,3,\*</sup>

<sup>1</sup>Laboratory of Systems Mucosal Biomodulation, Department of Microbiology and Immunology, Pusan National University School of Medicine, Yangsan, Korea, <sup>2</sup>Department of Internal Medicine, Pusan National University School of Medicine, Yangsan, Korea, <sup>3</sup>Research Institute for Basic Sciences, Pusan National University, Busan, Korea

**\* To whom correspondence should be addressed:**

Yuseok Moon, Department of Microbiology and Immunology, Pusan National University School of medicine, Yangsan, 626-813 Korea; Telephone: 82-51-510-8094; Fax: 82-55-382-8090; Email: [moon@pnu.edu](mailto:moon@pnu.edu)

## FIGURE LEGENDS

**Fig. S. 1. Effects of ER stress on IL-8 and CHOP production in human intestinal epithelial cells.**

**A.** HCT-8 cells were treated with 0.1  $\mu$ M TG for indicated time and each mRNA was measured using RT-real time PCR. **B.** HCT-8 cells were treated with 0.1 $\mu$ M TG for indicated time and cellular chromatin was immunoprecipitated with anti-C/EBP $\beta$  antibody. Collected chromatin was subjected to PCR.

**Fig S. 2. Involvement of CHOP in TG-induced IL-8 production.**

**A and B.** Stable cell lines (empty vector- or dnCHOP-expressing HCT-8) were treated with each dose of TG (A) or tunicamycin (B) for 24 h. Cellular viability was measured using MTT assay. Different alphabet over the each bar represents significantly difference between two group ( $p < 0.05$ ).

**A**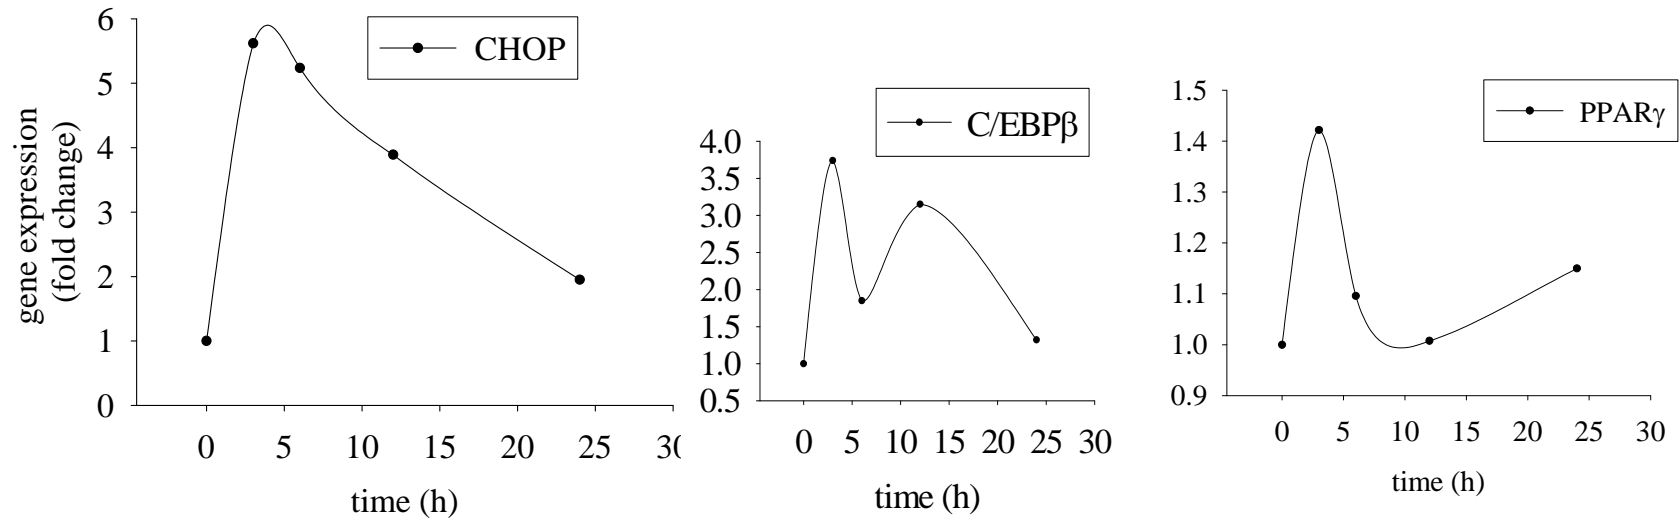**B**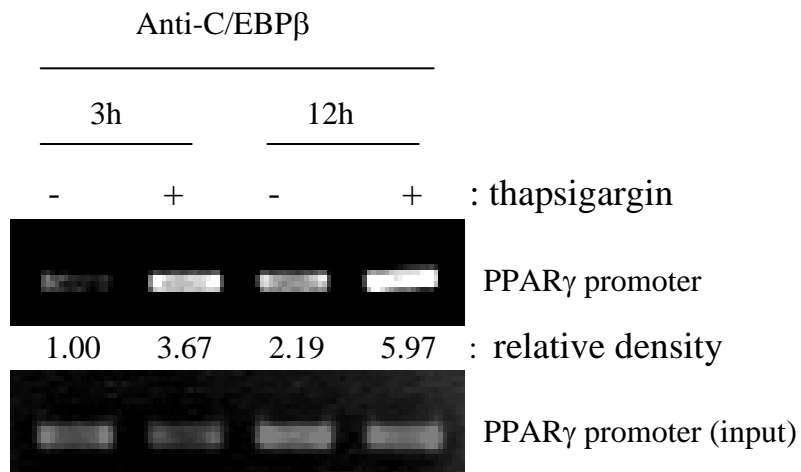

**A**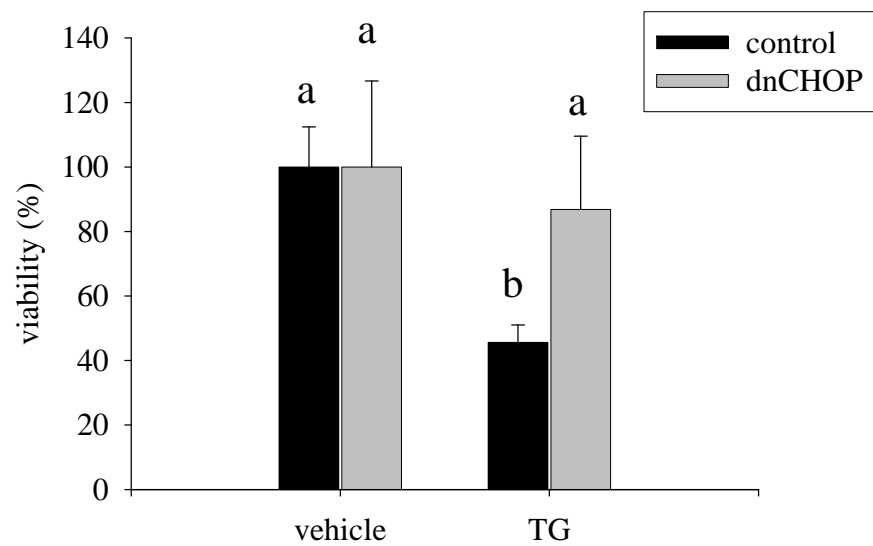**B**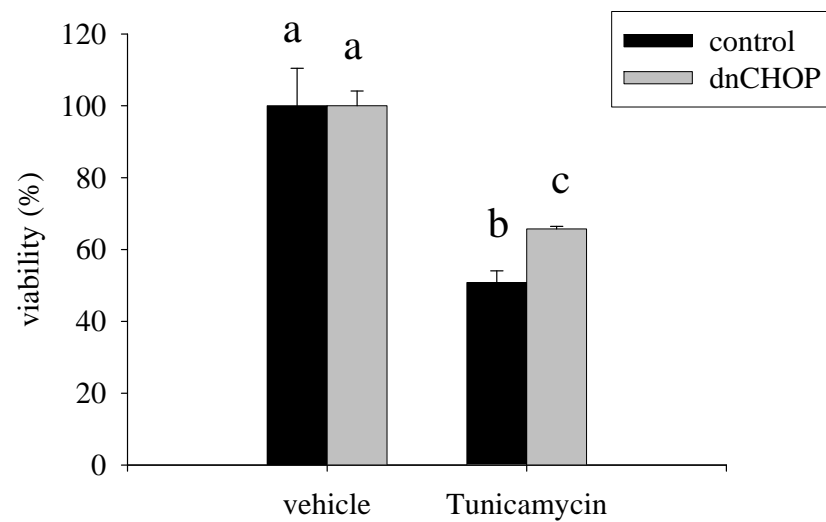

Supplement: supp_M110.136259_jbc.M110.136259-1.pdf [file supp_M110.136259_jbc.M110.136259-1.pdf]
